# Supplementary material for: Single Dose Novel Salmonella Vaccine Enhances Resistance against Visceralizing L. major and L. donovani Infection in Susceptible BALB/c Mice
Source: PLoS Negl Trop Dis. 2011 Dec 27;5(12):e1406. doi: 10.1371/journal.pntd.0001406 (PMC3246433; doi:10.1371/journal.pntd.0001406)
Supplement: Table S1 — Organ and body weights were determined for each mouse in the respective groups immunized with SL3261 or SL3261 carrying the indicated vaccine antigen expression plasmid in comparison to a group of untreated mice. Five mice per group per time point were killed by cervical dislocation and livers and spleens were removed and weighed. The body-mass indices (BMIs; see Fig. 4 in main manuscript) were calculated based on the mean weight values. n.d. = not done. (XLS) [file pntd.0001406.s004.xls]

## Sheet: Sheet1
Schroeder et al.
Table S1
			Weights [g] day 28			Weights [g] day 68
Vaccine groups	Mouse	Body	Spleen	Liver	Body	Spleen	Liver
	1	23.32	0.442	1.64	24.56	1.036	1.85
	2	21.45	0.42	1.409	22.47	0.93	1.66
Untreated	3	23.32	0.423	1.604	21.76	0.88	1.57
	4	24.84	0.415	1.655	25.8	1.05	1.88
	5	22.62	0.366	1.569	n.d.	n.d.	n.d.
Mean ± SD		23.11 ± 1.233	0.413 ± 0.028	1.575 ± 0.099	23.65 ± 1.863	0.974 ± 0.082	1.74 ± 0.149
	1	25.96	0.441	1.649	24.66	1.083	1.692
	2	23.05	0.455	1.557	22.55	0.77	1.74
SL3261	3	24.6	0.429	1.594	22.63	0.78	1.5
	4	22.84	0.387	1.507	22.86	0.79	1.64
	5	22.12	0.375	1.353	n.d.	n.d.	n.d.
Mean ± SD		23.71 ± 1.547	0.417 ± 0.035	1.532 ± 0.113	23.18 ± 0.999	0.856 ± 0.152	1.643 ± 0.104
	1	23.75	0.405	1.435	22.48	0.94	1.72
	2	22.18	0.432	1.408	23.44	0.95	1.68
pcVAC1-KMP	3	22.52	0.346	1.445	22.37	0.88	1.58
	4	22.03	0.499	1.496	23.31	0.92	1.81
	5	21.6	0.35	1.384	23.09	0.84	1.67
Mean ± SD		22.42 ± 0.816	0.406 ± 0.063	1.434 ± 0.042	22.94 ± 0.486	0.906 ± 0.046	1.692 ± 0.083
	1	23.94	0.387	1.439	23.98	0.77	1.61
	2	22.06	0.543	1.661	23.73	0.69	1.53
psVAC5-08.1190	3	22.88	0.481	1.643	23.05	0.79	1.49
	4	22.13	0.538	1.62	23.81	1.02	1.68
	5	23.2	0.55	1.753	21.26	0.55	1.43
Mean ± SD		22.84 ± 0.783	0.500 ± 0.069	1.623 ± 0.115	23.17 ± 1.123	0.764 ± 0.171	1.548 ± 0.099
	1	20.61	0.4	1.263	22.59	0.6	1.4
	2	23.36	0.448	1.521	22.35	0.77	1.42
Vaccine allstars	3	21.67	0.469	1.453	23.83	0.75	1.54
	4	22.45	0.403	1.427	24.09	0.65	1.55
	5	21.59	0.429	1.372	n.d.	n.d.	n.d.
Mean ± SD		21.94 ± 1.030	0.430 ± 0.029	1.407 ± 0.097	23.22 ± 0.872	0.692 ± 0.081	1.478 ± 0.078
